# Supplementary material for: Comprehension of the photoinduced charge transfer assisted energy transfer in Gd3+-based host sensitized tellurate phosphors for thermal sensing and anticounterfeiting labels
Source: Royal Society of Chemistry journal article supplement (doi:10.1039/d4dt00259h), 2024-01-01
Supplement: d4dt00259h1.pdf [file d4dt00259h1.pdf]

## COMPREHENSION OF THE PHOTOINDUCED CHARGE TRANSFER ASSISTED ENERGY TRANSFER IN $Gd^{3+}$ BASED HOST SENSITIZED TELLURATE PHOSPHOR FOR THERMAL SENSING AND ANTICOUNTERFEITING LABELS

Bhagyalekshmi G.L. and Subodh Ganesanpotti\*

Department of Physics, University of Kerala, Thiruvananthapuram, 695 581, India

\*Corresponding author: [gsubodh@gmail.com](mailto:gsubodh@gmail.com), [gsubodh@keralauniversity.ac.in](mailto:gsubodh@keralauniversity.ac.in).

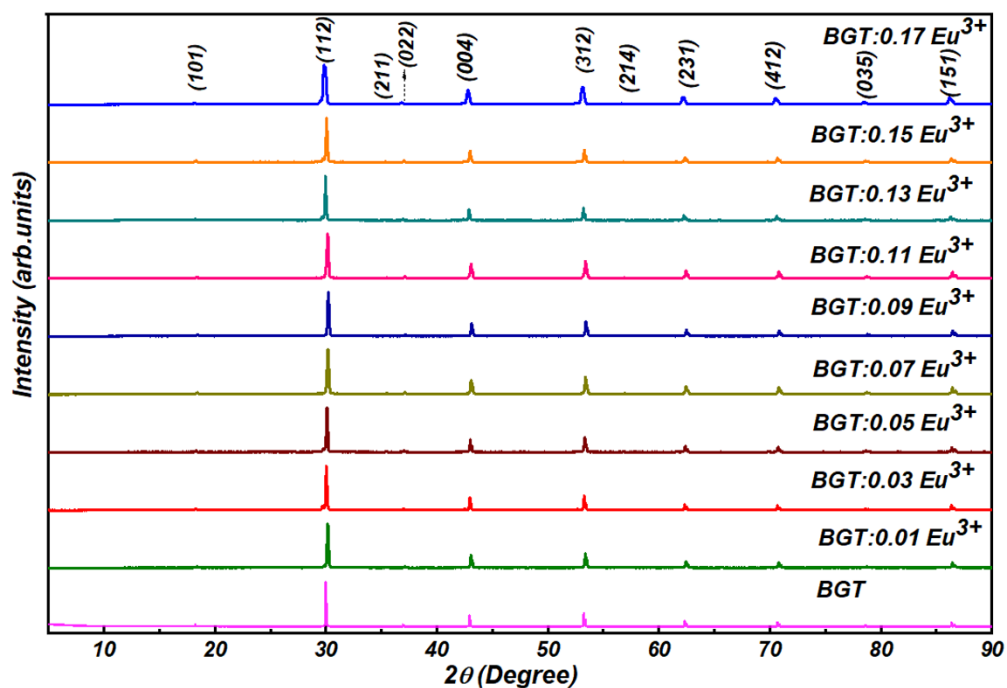

Fig. S1. XRD patterns of BGT:  $xEu^{3+}$  ( $x=0-0.17$ ) phosphor.

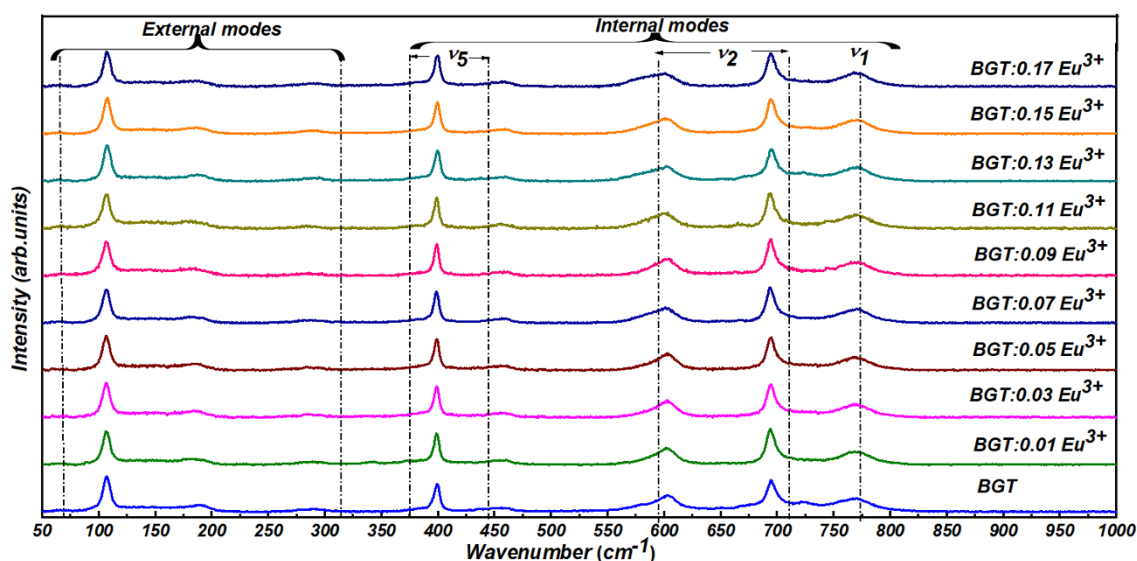

Fig. S2. Micro Raman spectra of BGT:  $xEu^{3+}$  ( $0-0.17$ ) phosphors.

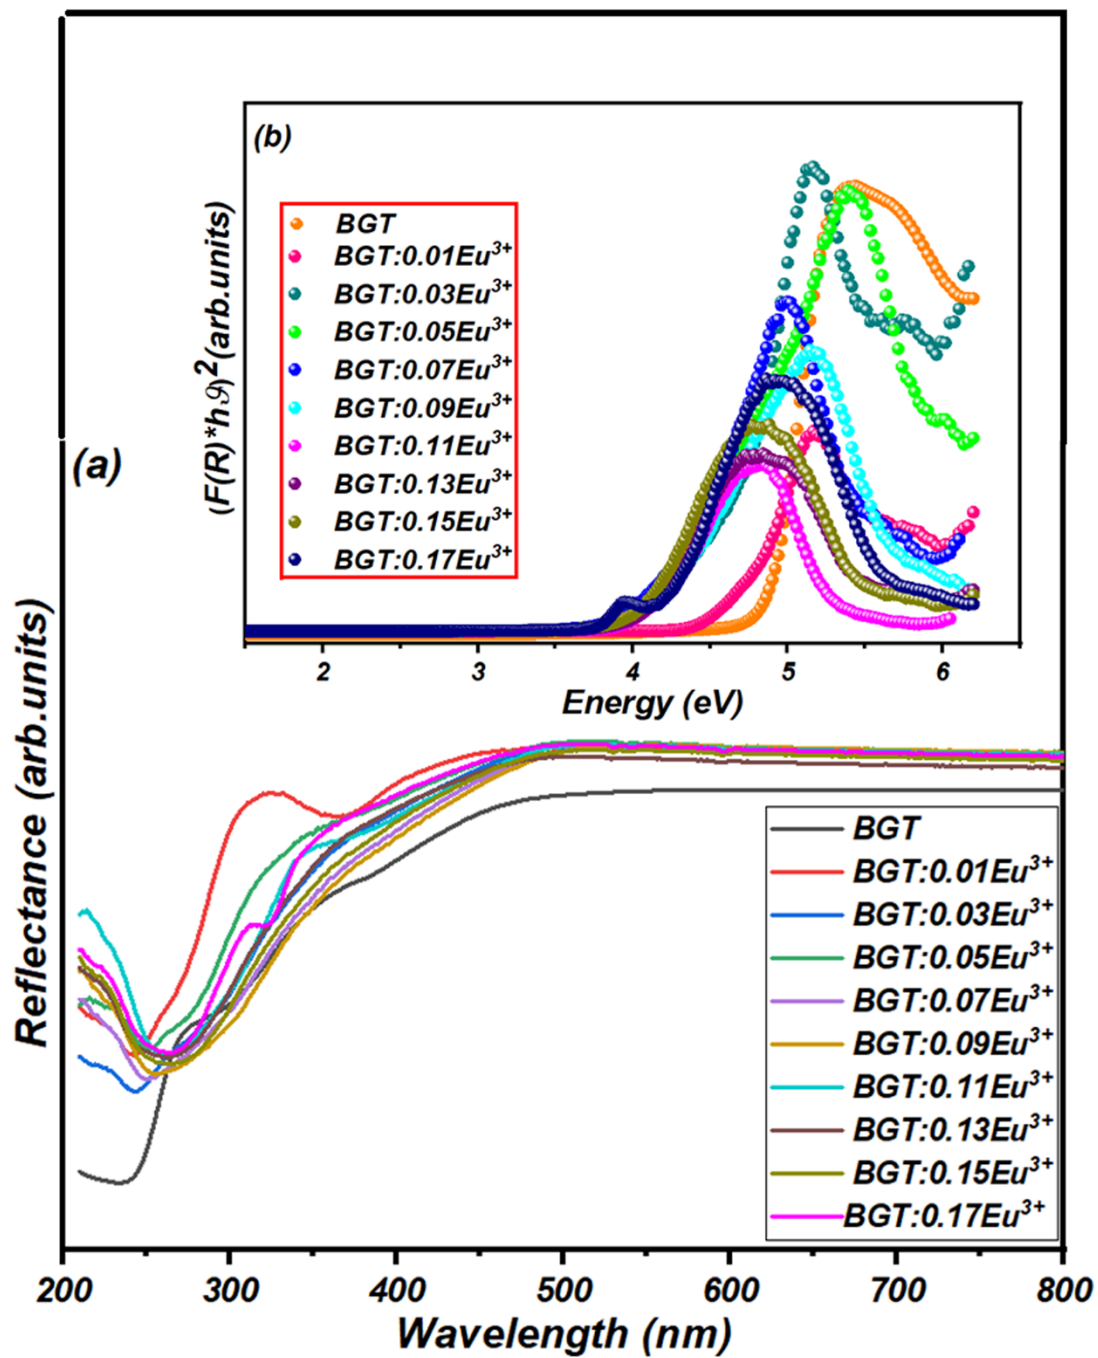

Fig. S3. DRS spectra of BGT: xEu<sup>3+</sup>(0-0.17) phosphors (Inset: Kubeka Munk plot).

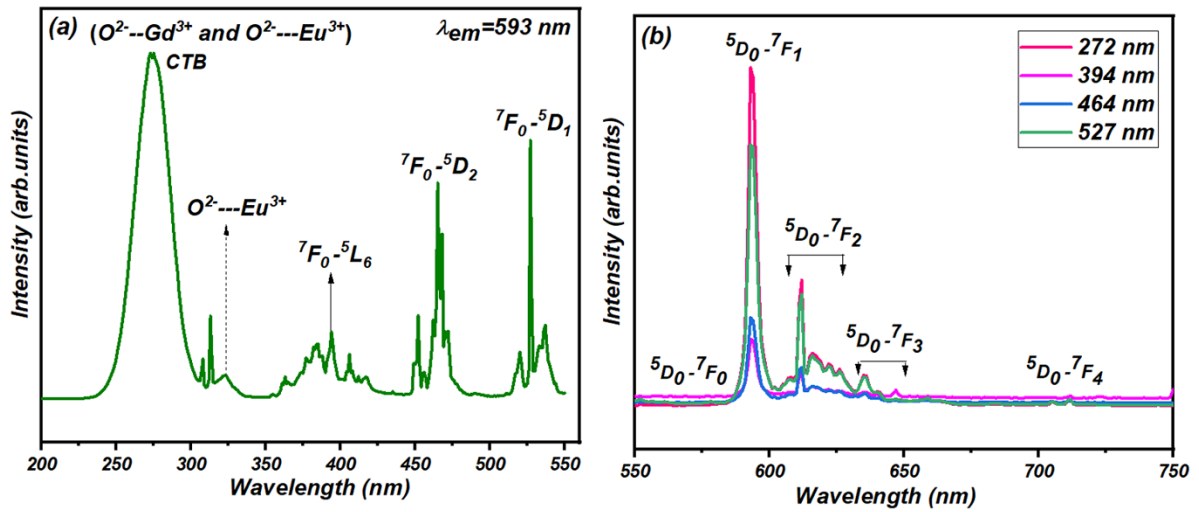

Fig. S4. (a) Excitation and (b) emission spectra of BGT:0.11Eu<sup>3+</sup> phosphor.

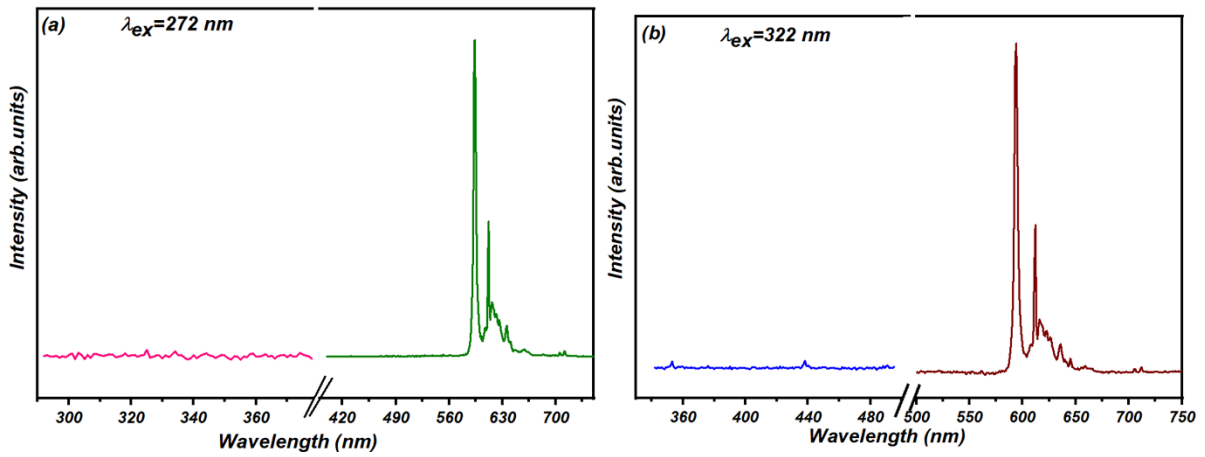

Fig. S5. Emission spectra of BGT:0.17Eu<sup>3+</sup> phosphor under 272 nm and 322 nm excitation.

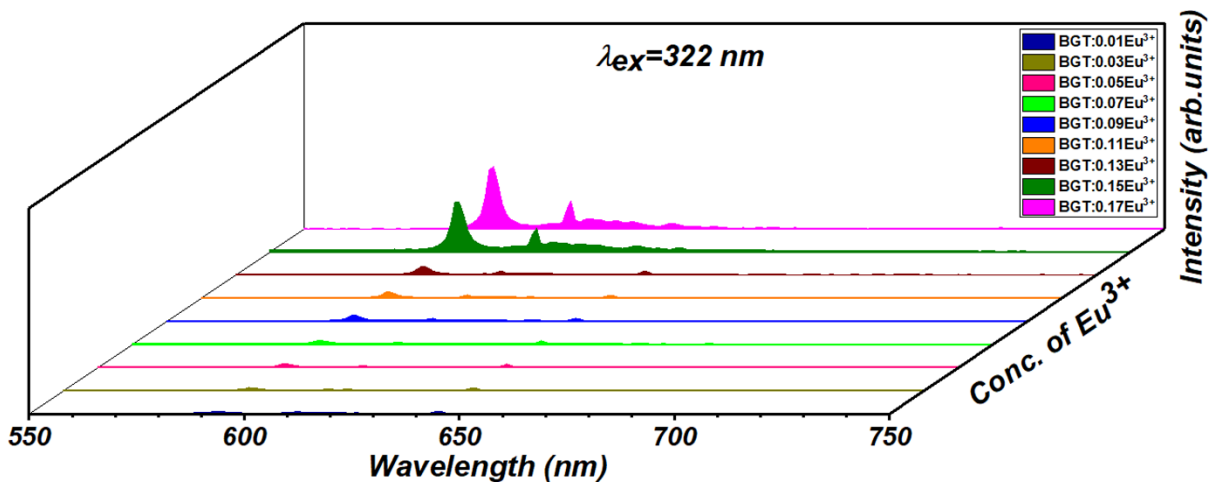

Fig. S6. Emission spectra of BGT: xEu<sup>3+</sup> (x=0.01-0.17) phosphors.

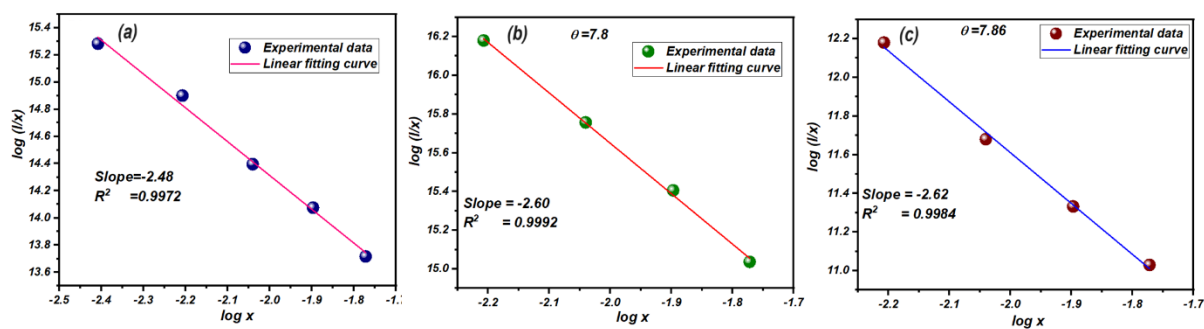

**Fig. S7.** Experimental and corresponding linear fitting of  $\log(I/x)$  versus  $\log(x)$  plot of (a) 593 nm, (b) 614 nm and (c) 637 nm.

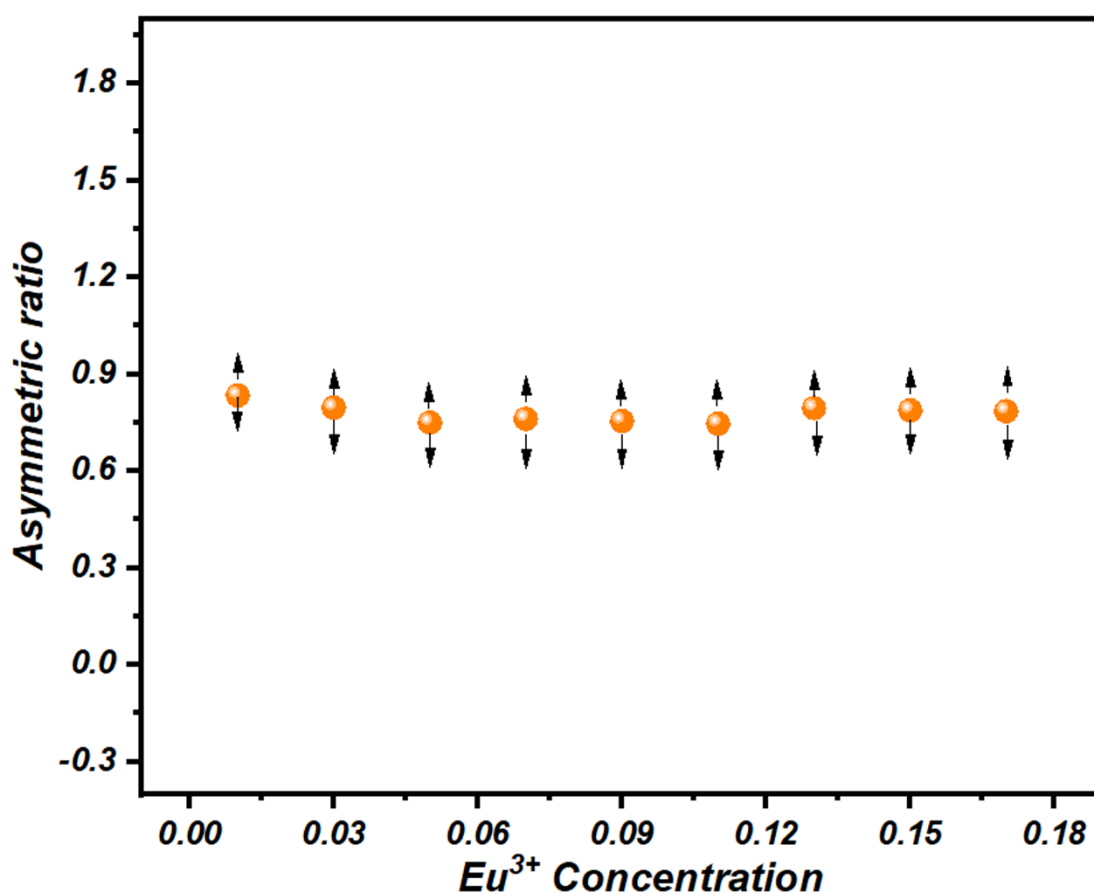

**Fig. S8.** Asymmetric ratio of BGT:  $x\text{Eu}^{3+}$  ( $x=0.01-0.17$ ) phosphor.

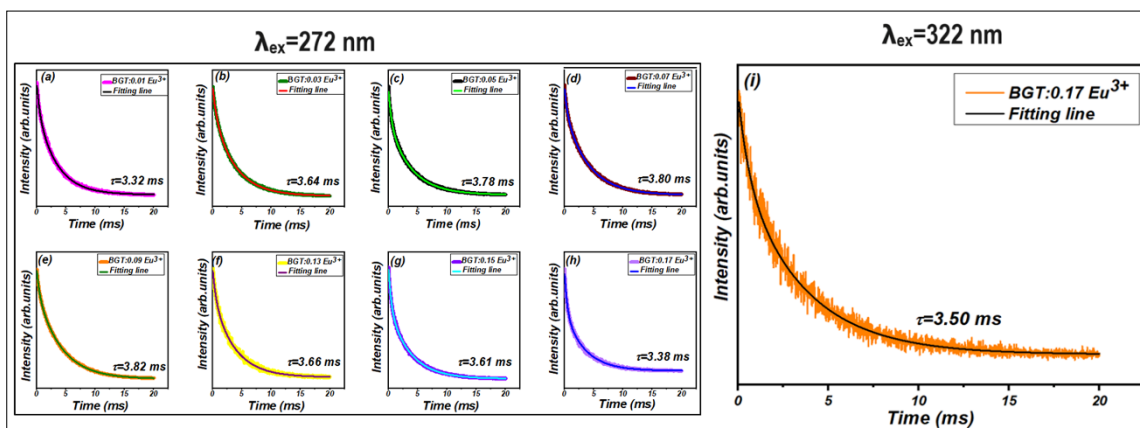

**Fig. S9.** (a-i) Decay curve of  $\text{Eu}^{3+}$  doped BGT phosphor.

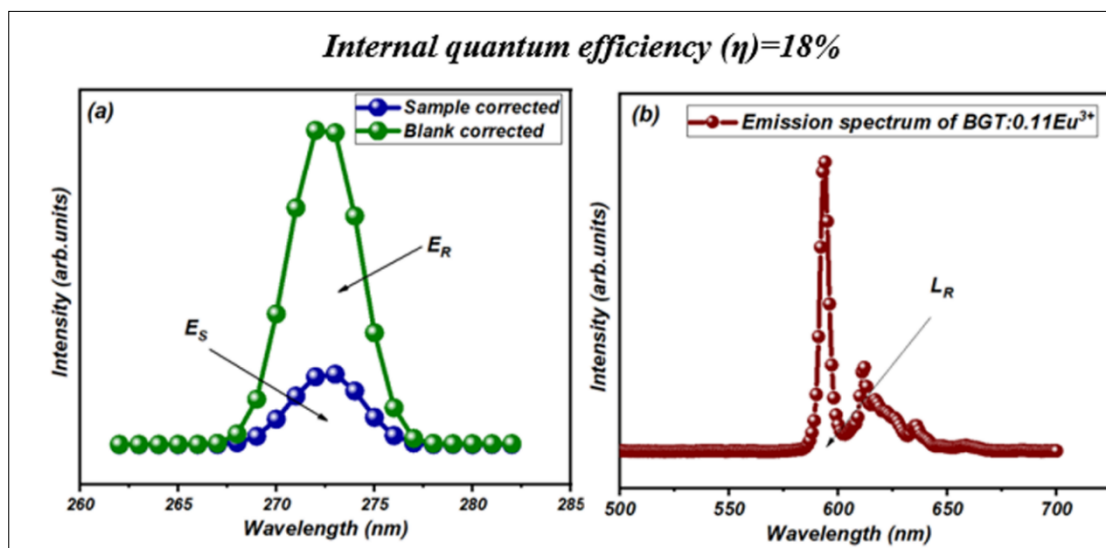

**Fig. S10.** Emission spectrum of  $\text{BaSO}_4$  and  $\text{BGT:0.11Eu}^{3+}$  phosphor collected by an integrating sphere.

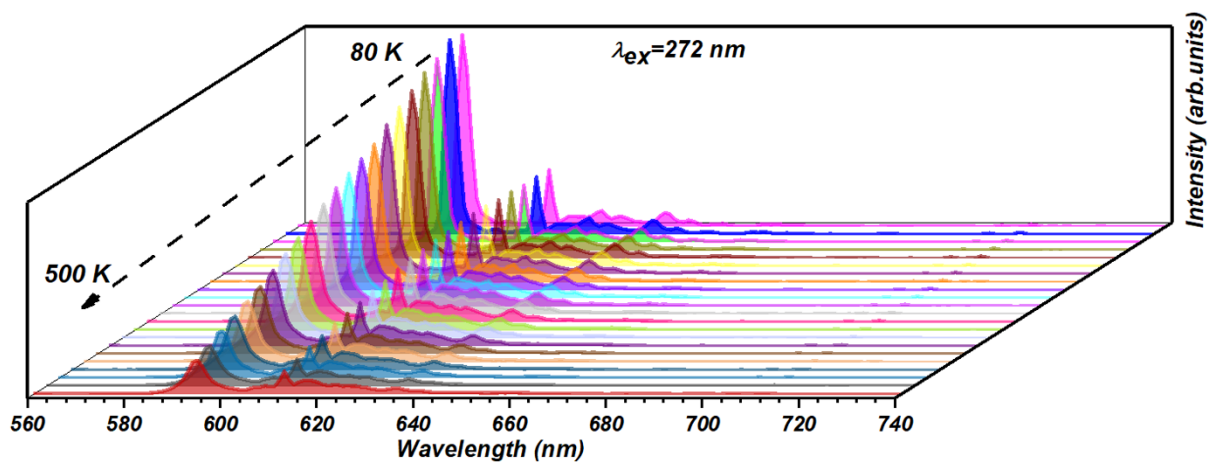

**Fig.S11.** Temperature dependant emission spectra of BGT:0.11Eu<sup>3+</sup> phosphor from 80-500 K.

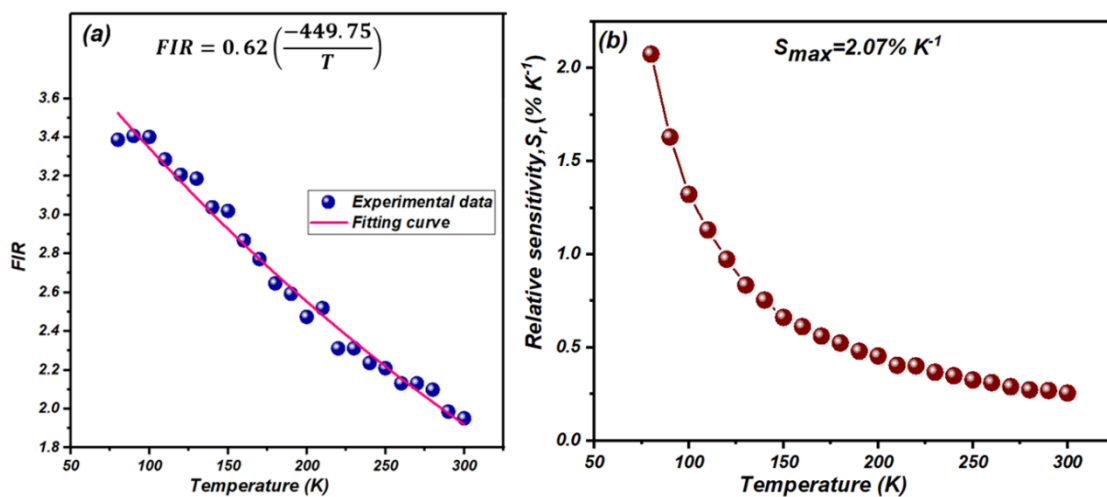

**Fig. S12.** Low temperature dependency (a) FIR and (b) relative sensitivity of BGT:0.11Eu<sup>3+</sup> phosphor.

**Table S1.** Lattice parameters and cell volume of BGT:  $x\text{Eu}^{3+}$  ( $x=0-0.17$ ) phosphors.

| Sample details           | $a$ (Å) | $b$ (Å) | $c$ (Å) | Cell volume (Å <sup>3</sup> ) |
|--------------------------|---------|---------|---------|-------------------------------|
| BGT                      | 5.95    | 5.99    | 8.46    | 301.94                        |
| BGT:0.01Eu <sup>3+</sup> | 5.96    | 6.03    | 8.43    | 303.24                        |
| BGT:0.03Eu <sup>3+</sup> | 5.98    | 6.07    | 8.35    | 303.69                        |
| BGT:0.05Eu <sup>3+</sup> | 5.95    | 6.05    | 8.42    | 304.04                        |
| BGT:0.07Eu <sup>3+</sup> | 5.96    | 6.05    | 8.43    | 305.05                        |
| BGT:0.09Eu <sup>3+</sup> | 5.95    | 6.05    | 8.48    | 306.47                        |
| BGT:0.11Eu <sup>3+</sup> | 5.95    | 6.09    | 8.46    | 307.39                        |
| BGT:0.13Eu <sup>3+</sup> | 5.95    | 6.14    | 8.42    | 308.24                        |
| BGT:0.15Eu <sup>3+</sup> | 5.95    | 6.15    | 8.42    | 308.66                        |
| BGT:0.17Eu <sup>3+</sup> | 5.96    | 6.15    | 8.44    | 310.33                        |

**Table S2.** Refined crystallographic parameters of BGT:0.11 Eu<sup>3+</sup> phosphor.

| Compound              | $\text{Ba}_2\text{Gd}_{2/3}\text{TeO}_6:0.11 \text{Eu}^{3+}$ |
|-----------------------|--------------------------------------------------------------|
| $R_{\text{exp}}$ (%)  | 2.92                                                         |
| $R_{\text{wp}}$ (%)   | 4.23                                                         |
| $R_p$ (%)             | 3.21                                                         |
| GOF                   | 1.45                                                         |
| Symmetry              | Monoclinic                                                   |
| Space group           | $P2_1/n$                                                     |
| $a$ (Å)               | 5.95                                                         |
| $b$ (Å)               | 6.09                                                         |
| $c$ (Å)               | 8.47                                                         |
| $\beta$ (°)           | 90.68                                                        |
| $V$ (Å <sup>3</sup> ) | 307.39                                                       |

**Table S3.** Relative sensitivity values of  $\text{Eu}^{3+}$  doped phosphors.

| Study                                                                                                            | Temperature range | Relative sensitivity<br>%( $\text{K}^{-1}$ ) |
|------------------------------------------------------------------------------------------------------------------|-------------------|----------------------------------------------|
| $\text{Ba}_2\text{Gd}_{2/3}\text{TeO}_6:\text{Eu}^{3+}$ [Present work]                                           | 80-300 K          | 2.07                                         |
|                                                                                                                  | 300-500 K         | 0.19                                         |
| $\text{ZnTiO}_3:\text{Mn}^{4+}, \text{Eu}^{3+}$ [1]                                                              | 80-310 K          | 2.5                                          |
| $\text{Sr}_2\text{GdSbO}_6:\text{Eu}^{3+}$ [2]                                                                   | 283-433 K         | 0.27                                         |
| $\text{Ca}_2\text{InNbO}_6:\text{Eu}^{3+}$ [3]                                                                   | 303-483 K         | 0.365                                        |
| $\text{Sr}_2\text{GaNbO}_6:0.018\text{Eu}^{3+}$ [4]                                                              | 298-623 K         | 1.86                                         |
| $\text{SrGdLiTeO}_6:\text{Eu}^{3+}/\text{Mn}^{4+}$ [5]                                                           | 300 – 550K        | 0.229                                        |
| $\text{CaLaMgTaO}_6:\text{Eu}^{3+}/\text{Bi}^{3+}$ [6]                                                           | 393 – 573K        | 1.33                                         |
| $\text{La}_2\text{LiNbO}_6:\text{Bi}^{3+}, \text{Eu}^{3+}$ [7]                                                   | 298 – 498 K       | 0.9                                          |
| $\text{NaLaMgWO}_6:\text{Mn}^{4+}, \text{Eu}^{3+}$ [8]                                                           | 303–523 K         | 0.86                                         |
| $\text{Ba}_2\text{LaNbO}_6:\text{Mn}^{4+}, \text{Eu}^{3+}$ [9]                                                   | 298–498 K         | 2.08                                         |
| $\text{SrY}_2\text{O}_4:\text{Bi}^{3+}, \text{Eu}^{3+}$ [10]                                                     | 313–563 K         | 0.86                                         |
| $\text{La}_2\text{ZnTiO}_6:\text{Bi}^{3+}, \text{Eu}^{3+}$ [11]                                                  | 293-473 K         | 1.23                                         |
| $\text{CsPbBr}_3/\text{EuPO}_4$ nanocrystals@glass[12]                                                           | 303 – 483K        | 1.80                                         |
| $\text{SrAl}_2\text{O}_4:\text{Eu}^{2+/3+}$ [13]                                                                 | 298-473 K         | 1.6                                          |
| $\text{Mg}_{28}\text{Ge}_{6.25}\text{Ga}_{1.2}\text{O}_{32}\text{F}_{15.04}:\text{Eu}^{2+}, \text{Mn}^{4+}$ [14] | 303–473 K         | 1.38                                         |
| $\text{Lu}_3\text{Al}_5\text{O}_{12}:\text{Mn}^{4+}, \text{Eu}^{3+}$ [15]                                        | 300-360 K         | 0.7                                          |
| $\text{Ba}_2\text{La}_{2/3}\text{TeO}_6:\text{Eu}^{3+}$ [16]                                                     | 315 - 483 K       | 0.21                                         |
| $\text{Sr}_2\text{CdTeO}_6:\text{Eu}^{3+}$ [17]                                                                  | 300-500 K         | 0.28                                         |

- 1 B. Zhu, Q. Yang, W. Zhang, S. Cui, B. Yang, Q. Wang, S. Li and D. Zhang, *Spectrochim. Acta Part A Mol. Biomol. Spectrosc.*, 2022, **274**, 121101.
- 2 Y. Tai, R. Cui, J. Zhang, C. Wang, T. Zhao, B. Zhang and C. Deng, *J. Rare Earths*, , DOI:10.1016/j.jre.2023.06.009.
- 3 Y. Hua, T. Wang, J. S. Yu, W. Ran and L. Li, *Inorg. Chem. Front.*, 2022, **9**, 6211–6224.
- 4 Q. Chen, X. Yang, G. Zhang, Q. Ma, S. Han and B. Ma, *Opt. Mater. (Amst.)*, 2021, **111**, 110585.
- 5 L. Li, G. Tian, Y. Deng, Y. Wang, Z. Cao, F. Ling, Y. Li, S. Jiang, G. Xiang and X. Zhou, *Opt. Express*, 2020, **28**, 33747.
- 6 C. Xu, C. Li, D. Deng, H. Yu, L. Wang, C. Shen, X. Jing and S. Xu, *J. Lumin.*, 2021, **236**, 118096.
- 7 M. Song, W. Ran, Y. Ren, L. Wang and W. Zhao, *J. Alloys Compd.*, 2021, **865**, 158825.
- 8 H. Zhou, N. Guo, M. Zhu, J. Li, Y. Miao and B. Shao, *J. Lumin.*, 2020, **224**, 117311.
- 9 P. Wang, J. Mao, L. Zhao, B. Jiang, C. Xie, Y. Lin, F. Chi, M. Yin and Y. Chen, *Dalt. Trans.*, 2019, **48**, 10062–10069.



- 10 R. Wei, J. Guo, K. Li, L. Yang, X. Tian, X. Li, F. Hu and H. Guo, *J. Lumin.*, 2019, **216**, 116737.
- 11 J. Wang, R. Lei, S. Zhao, F. Huang, D. Deng, S. Xu and H. Wang, *J. Alloys Compd.*, 2021, **881**, 160601.
- 12 C. Wang, H. Lin, X. Xiang, Y. Cheng, Q. Huang, Y. Gao, X. Cui and Y. Wang, *J. Mater. Chem. C*, 2018, **6**, 9964–9971.
- 13 Z. Wang, G. Ma, C. Xie, X. Bu, R. Mi, J. Chen and Y. Liu, *J. Alloys Compd.*, 2023, **941**, 168912.
- 14 Z. Yang, Z. Wang, M. Zheng, X. Wang, J. Cui, Y. Yao, L. Cao, M. Zhang, H. Suo and P. Li, *Mater. Today Commun.*, 2021, **28**, 102660.
- 15 B. Yan, Y. Wei, W. Wang, M. Fu and G. Li, *Inorg. Chem. Front.*, 2021, **8**, 746–757.
- 16 S. C. Lal, V. Lalan and S. Ganesanpotti, *Inorg. Chem.*, 2018, **57**, 6226–6236.
- 17 N. J. Suraja, A. Mahesh, K. S. Sibi and S. Ganesanpotti, *J. Alloys Compd.*, 2021, **865**, 158902.
